# Supplementary material for: Fungal Diversity in the Inhovde Area, East Antarctica
Source: Preprints.org preprint supplement (doi:10.20944/preprints202407.1884.v1), 2024-07-24
Supplement: Supplementary file 1 [file supplementary]

**Supplementary**

**Supplemental Table S1. Species names, strain names and GenBank accession numbers of the ITS region and D1/Dr2 domain sequences of fungal isolates from Inhovde area.**

| Species | Strain | Accession number |
| --- | --- | --- |
| *Cystobasidium ongulense* | NIPR-00453 | LC810223 |
| *Vishniacozyma victoriae* | NIPR-00454 | LC810224 |
| *Vishniacozyma victoriae* | NIPR-00455 | LC810225 |
| *Aotearoamyces* sp. | NIPR-00457 | LC810226 |
| *Vishniacozyma victoriae* | NIPR-00458 | LC810227 |
| *Glaciozyma watsonii* | NIPR-00459 | LC810228 |
| *Glaciozyma watsonii* | NIPR-00460 | LC810229 |
| *Glaciozyma watsonii* | NIPR-00461 | LC810230 |
| *Vishniacozyma victoriae* | NIPR-00462 | LC810231 |
| *Glaciozyma watsonii* | NIPR-00463 | LC810232 |
| *Vishniacozyma victoriae* | NIPR-00464 | LC810233 |
| *Glaciozyma watsonii* | NIPR-00465 | LC810234 |
| *Naganishia friedmannii* | NIPR-00466 | LC810235 |
| *Cystobasidium ongulense* | NIPR-00467 | LC810236 |
| *Cystobasidium ongulense* | NIPR-00468 | LC810237 |
| *Cystobasidium ongulense* | NIPR-00469 | LC810238 |
| *Vishniacozyma victoriae* | NIPR-00470 | LC810239 |
| *Vishniacozyma victoriae* | NIPR-00471 | LC810240 |
| *Vishniacozyma victoriae* | NIPR-00472 | LC810241 |
| *Vishniacozyma victoriae* | NIPR-00473 | LC810242 |
| *Vishniacozyma victoriae* | NIPR-00474 | LC810243 |
| *Vishniacozyma victoriae* | NIPR-00475 | LC810244 |
| *Vishniacozyma victoriae* | NIPR-00476 | LC810245 |
| *Naganishia adeliensis* | NIPR-00477 | LC810246 |
| *Vishniacozyma victoriae* | NIPR-00478 | LC810247 |
| *Vishniacozyma victoriae* | NIPR-00479 | LC810248 |
| *Naganishia albidosimilis* | NIPR-00480 | LC810249 |
| *Vishniacozyma victoriae* | NIPR-00481 | LC810250 |
| *Vishniacozyma victoriae* | NIPR-00482 | LC810251 |
| *Vishniacozyma victoriae* | NIPR-00483 | LC810252 |
| *Vishniacozyma victoriae* | NIPR-00484 | LC810253 |
| *Vishniacozyma victoriae* | NIPR-00485 | LC810254 |
| *Vishniacozyma victoriae* | NIPR-00486 | LC810255 |
| *Cystobasidium ongulense* | NIPR-00487 | LC810256 |
| *Cystobasidium ongulense* | NIPR-00488 | LC810257 |
| *Cystobasidium ongulense* | NIPR-00489 | LC810258 |
| *Vishniacozyma victoriae* | NIPR-00490 | LC810259 |
| *Vishniacozyma victoriae* | NIPR-00491 | LC810260 |
| *Vishniacozyma victoriae* | NIPR-00492 | LC810261 |
| *Vishniacozyma victoriae* | NIPR-00493 | LC810262 |
| *Vishniacozyma victoriae* | NIPR-00494 | LC810263 |
| *Vishniacozyma victoriae* | NIPR-00495 | LC810264 |
| *Glaciozyma watsonii* | NIPR-00496 | LC810265 |
| *Glaciozyma watsonii* | NIPR-00497 | LC810266 |
| *Vishniacozyma victoriae* | NIPR-00499 | LC810267 |
| *Glaciozyma watsonii* | NIPR-00500 | LC810268 |
| *Glaciozyma watsonii* | NIPR-00501 | LC810269 |
| *Glaciozyma watsonii* | NIPR-00502 | LC810270 |
| *Glaciozyma watsonii* | NIPR-00503 | LC810271 |
| *Glaciozyma watsonii* | NIPR-00504 | LC810272 |
| *Glaciozyma watsonii* | NIPR-00505 | LC810273 |
| *Glaciozyma watsonii* | NIPR-00506 | LC810274 |
| *Glaciozyma watsonii* | NIPR-00507 | LC810275 |
| *Glaciozyma watsonii* | NIPR-00508 | LC810276 |
| *Glaciozyma watsonii* | NIPR-00509 | LC810277 |
| *Glaciozyma watsonii* | NIPR-00510 | LC810278 |
| *Glaciozyma watsonii* | NIPR-00511 | LC810279 |
| *Vishniacozyma victoriae* | NIPR-00512 | LC810280 |
| *Vishniacozyma victoriae* | NIPR-00514 | LC810281 |
| *Vishniacozyma victoriae* | NIPR-00515 | LC810282 |
| *Vishniacozyma victoriae* | NIPR-00516 | LC810283 |
| *Mrakia gelida* | NIPR-00517 | LC810284 |
| *Mrakia gelida* | NIPR-00518 | LC810285 |
| *Mrakia gelida* | NIPR-00519 | LC810286 |
| *Vishniacozyma victoriae* | NIPR-00520 | LC810287 |
| *Vishniacozyma victoriae* | NIPR-00521 | LC810288 |
| *Vishniacozyma victoriae* | NIPR-00522 | LC810289 |
| *Vishniacozyma victoriae* | NIPR-00523 | LC810290 |
| *Vishniacozyma victoriae* | NIPR-00524 | LC810291 |
| *Mrakia gelida* | NIPR-00527 | LC810292 |
| *Cystobasidium ongulense* | NIPR-00528 | LC810293 |
| *Aotearoamyces* sp. | NIPR-00529 | LC810294 |
| *Vishniacozyma victoriae* | NIPR-00530 | LC810295 |
| *Pseudeurotium hygrophilum* | NIPR-00531 | LC810296 |
| *Mrakia robertii* | NIPR-00532 | LC810297 |
| *Vishniacozyma victoriae* | NIPR-00533 | LC810298 |
| *Naganishia friedmannii* | NIPR-00534 | LC810299 |
| *Vishniacozyma victoriae* | NIPR-00535 | LC810300 |
| *Cystobasidium ongulense* | NIPR-00536 | LC810301 |
| *Cystobasidium ongulense* | NIPR-00537 | LC810302 |
| *Cystobasidium ongulense* | NIPR-00538 | LC810303 |
| *Cystobasidium* sp. | NIPR-00539 | LC493222 |
| *Cystobasidium ongulense* | NIPR-00540 | LC810304 |
| *Vishniacozyma victoriae* | NIPR-00541 | LC810305 |
| *Cystobasidium ongulense* | NIPR-00542 | LC810306 |
| *Cystobasidium* sp. | NIPR-00543 | LC810307 |
| *Vishniacozyma victoriae* | NIPR-00544 | LC810308 |
| *Glaciozyma watsonii* | NIPR-00545 | LC810309 |
| *Cystobasidium ongulense* | NIPR-00548 | LC810310 |
| *Cystobasidium ongulense* | NIPR-00549 | LC810311 |
| *Naganishia friedmannii* | NIPR-00550 | LC810312 |
| *Glaciozyma watsonii* | NIPR-00551 | LC810313 |
| *Mrakia gelida* | NIPR-00552 | LC810314 |
| *Vishniacozyma victoriae* | NIPR-00553 | LC810315 |
| *Vishniacozyma victoriae* | NIPR-00554 | LC810316 |
| *Vishniacozyma victoriae* | NIPR-00555 | LC810317 |
| *Vishniacozyma victoriae* | NIPR-00556 | LC810318 |
| *Vishniacozyma victoriae* | NIPR-00557 | LC810319 |
| *Vishniacozyma victoriae* | NIPR-00558 | LC810320 |
| *Glaciozyma watsonii* | NIPR-00559 | LC810321 |
| *Glaciozyma watsonii* | NIPR-00560 | LC810322 |
| *Glaciozyma watsonii* | NIPR-00561 | LC810323 |
| *Glaciozyma watsonii* | NIPR-00562 | LC810324 |
| *Glaciozyma watsonii* | NIPR-00563 | LC810325 |
| *Glaciozyma watsonii* | NIPR-00564 | LC810326 |
| *Glaciozyma watsonii* | NIPR-00565 | LC810327 |
| *Glaciozyma watsonii* | NIPR-00566 | LC810328 |
| *Glaciozyma watsonii* | NIPR-00567 | LC810329 |
| *Glaciozyma watsonii* | NIPR-00568 | LC810330 |
| *Glaciozyma watsonii* | NIPR-00569 | LC810331 |
| *Glaciozyma watsonii* | NIPR-00570 | LC810332 |
| *Glaciozyma watsonii* | NIPR-00571 | LC810333 |
| *Glaciozyma watsonii* | NIPR-00572 | LC810334 |
| *Leuconeurospora* sp. | NIPR-00574 | LC810335 |
| *Naganishia friedmannii* | NIPR-00575 | LC810336 |
| *Aotearoamyces* sp. | 051-20-2 | LC810337 |
| *Symbiotaphrina microtheca* | 051-20Y-1 | LC810338 |
| *Mrakia robertii* | 055-4-4 | LC810339 |
| *Mrakia robertii* | 055-4-5 | LC810340 |
| *Mrakia robertii* | 055-4-6 | LC810341 |
| *Mrakia robertii* | 055-4-7 | LC810342 |
| *Mrakia robertii* | 055-4-8 | LC810343 |
| *Mrakia robertii* | 055-4Y-1 | LC810344 |
| *Mrakia robertii* | 055-4Y-2 | LC810345 |
| *Mrakia robertii* | 055-4Y-4 | LC810346 |
| *Cystobasidium ongulense* | 056-20-3 | LC810347 |
| *Cystobasidium ongulense* | 056-20-4 | LC810348 |
| *Cystobasidium ongulense* | 056-20-5 | LC810349 |
| *Cystobasidium ongulense* | 056-20-7 | LC810350 |
| *Cystobasidium* sp. | 056-1-20Y-2 | LC810351 |
| *Leucosporidium yakuticum* | 057-4Y-3 | LC810352 |
| *Glaciozyma watsonii* | 057-4Y-4 | LC810353 |
| *Glaciozyma watsonii* | 058-4-3 | LC810354 |
